# Supplementary material for: Identification of Perspective Oat Cultivars with a Minimum Content of Gluten Homologous Peptides
Source: Preprints.org preprint supplement (doi:10.20944/preprints202010.0596.v1), 2020-10-28
Supplement: Supplementary file 1 [file supplementary]

## Sheet: List1
Suplemeted Tab 1. Complete list of tested oat cultivars
Cultivar	Avena species	State of Origin
Aarre	sativa	FIN
Abel	nuda	CZE
AC Preaknes	sativa	CAN
Adam	nuda	CZE
Apollon	sativa	RUS
APR166	sativa	GER
Ardo	sativa	CZE
Atego	sativa	CZE
Auron	sativa	CZE
Auteuil	sativa var. nigra	FRA
Avenuda	nuda	CZE
Avesta	sativa var. nigra	FRA
Azur	sativa	CZE
Banquo	sativa	GBR
Belinda	sativa	FIN
Bison	sativa	RUS
Black	sativa var. nigra	FRA
Buggy	sativa	GER
Canyon	sativa	GER
Cavaliere	sativa var. nigra	CZE
CC4146	sativa var. nigra	GBR
CDC Boyer	sativa	CAN
Classic	sativa	USA
Coach	sativa	GER
Creole	sativa var. nigra	FRA
Cyril	sativa	CZE
Český žlutý	sativa	CZE
Dalimil	sativa	CZE
David	sativa	CZE
Debyut	sativa	BEL
Diadém	sativa	CZE
Dominik	sativa	GER
Drummer	sativa	GER
Dukat	sativa	POL
Ebene	sativa var. nigra	FRA
Efendi	sativa	AUT
Efesos	sativa	AUT
Espresso	sativa	AUT
Euro	sativa	AUT
Expander	sativa	AUT
Expo	sativa	AUT
Flamingsnova	sativa	GER
Flämingsprofi	sativa	GER
Florian	sativa	CZE
Freddy	sativa	GER
Gana	nuda	RUS
Garland	sativa	USA
GK Iringo	sativa	HUN
Gregor	sativa	CZE
Husky	sativa	GER
Hynek	nuda	CZE
Ivore	sativa	FRA
Izak	nuda	CZE
Jaak	sativa	EST
Jawor	sativa	POL
Jim	sativa	USA
Johanna	sativa	BEL
Kalle	sativa	EST
Kamil	nuda	CZE
Katri	sativa	FIN
Kermit	sativa	IRL
Kertag	sativa	CZE
Korok	sativa	CZE
KWS Contender	sativa	GER
Lennon	nuda	GBR
Leo	sativa	GER
Lidya	sativa	RUS
Longchamp	sativa	FRA
Maelor	sativa	GBR
Maldwyn	sativa	GBR
Marco Polo	nuda	CZE
Maris Oberon	sativa	GBR
Martin	sativa	NOR
Max	sativa	GER
Mediteran	sativa	SCG
Melys	sativa	GBR
Milton	sativa	USA
Mojacar	sativa	CZE
Myriane	sativa	NLD
Navaro	nuda	CAN
Neklan	sativa	CZE
Norbert	sativa	CZE
Nordstern	sativa	GER
OA 504-5	nuda	CAN
Obelisk	sativa	CZE
Oberon	sativa	CZE
Ogle	sativa	USA
Oliver	nuda	CZE
Otakar	nuda	CZE
Otee	sativa	USA
Pan	sativa	CZE
Patrik	nuda	CZE
Pennlo	sativa	USA
Polaris	sativa	ARG
Poncho	sativa	FRA
Poseidon	sativa	GER
Prairie	sativa	CAN
Pusahybrid	sativa	IRL
Radius	sativa	CZE
Ranch	sativa var. nigra	FRA
Raven	sativa var. nigra	CZE
Riel	sativa	CAN
Roger 8	sativa	ITA
Roope	sativa	FIN
Rozmar	sativa	CZE
Sagar	sativa	CZE
Salo	sativa	SWE
Salomon	nuda	GER
Sang	sativa	SWE
Santini	sativa	CZE
Saul	nuda	CZE
Scorpion	sativa	GER
Seldon	sativa	CZE
SG-K 144228	sativa var. nigra	CZE
SG-K 16369	sativa	CZE
SG-K 16370	sativa	CZE
SG-K 16654	sativa	CZE
SG-K 6027	nuda	CZE
Shadow	nuda	CAN
Sirene	sativa var. nigra	FRA
Somesan	sativa	ROU
Tibor	nuda	CZE
Tjumenski golozernői	nuda	RUS
Tucana	sativa	ARG
Valiant	sativa	NLD
Veles	sativa	CZE
Veli	sativa	FIN
Vok	sativa	CZE
Walderm	sativa	CAN
Yty	sativa	FIN
Zlaťák	sativa	CZE
Zuton	nuda	GBR
